# Supplementary material for: GlmU inhibitor from the roots of Euphorbia ebracteolata as an anti-tuberculosis agent
Source: Royal Society of Chemistry journal article supplement (doi:10.1039/d2ra02044k), 2022-01-01
Supplement: d2ra02044k1.pdf [file d2ra02044k1.pdf]

## Supplementary material

### **GlmU inhibitor from the roots of *Euphorbia ebracteolata* as the anti-tuberculosis agent**

Xiuyan Han<sup>a,b,‡</sup>, Changming Chen<sup>c,‡</sup>, Honglei Wang<sup>a</sup>, Jian Kang<sup>b</sup>, Qiulong Yan<sup>b</sup>,  
Yufang Ma<sup>b</sup>, Wenxin Wang<sup>a</sup>, Shan Wu<sup>a</sup>, Chao Wang<sup>a,\*</sup>, Xiaochi Ma<sup>a,\*</sup>

<sup>a</sup> Second Affiliated Hospital, Institute of Integrative Medicine, Dalian Medical University, Dalian 116044, P.R. of China

<sup>b</sup> Department of Biochemistry and Molecular Biology, Dalian Medical University, Dalian 116044, P.R. of China

<sup>c</sup> Department of Rheumatology and Immunology, The Second Affiliated Hospital of Guizhou University of Traditional Chinese Medicine, Guiyang 550001, P.R. of China

\* Corresponding authors:

Dalian Medical University, No. 9 Western Section of Lvshun South Road, Dalian 116044, China;

*E-mail addresses:* wach\_edu@sina.com (C. Wang); maxc1978@163.com (X. Ma);

Tel/Fax: +86-411-86110419

‡ These authors contributed equally to this work.

## Index

|                                                                                                                                         |   |
|-----------------------------------------------------------------------------------------------------------------------------------------|---|
| Table S1. Herbal medicines and their inhibitory effects against GlmU AT. ....                                                           | 2 |
| Table S2. The inhibitory effect of Ebractenoid F on GlmU acetyltransferase.....                                                         | 4 |
| Figure S1. <sup>1</sup> H NMR spectrum (CDCl <sub>3</sub> , 600 MHz) of Ebractenoid F.....                                              | 4 |
| Figure S2. <sup>13</sup> C NMR spectrum (CDCl <sub>3</sub> , 150 MHz) of Ebractenoid F.....                                             | 5 |
| Figure S3. HR-MS of Ebractenoid F.....                                                                                                  | 5 |
| Figure S4. Docking analysis of ebractenoid F and GlmU (PDB code: 4K6R).....                                                             | 6 |
| Table S3. Sequences of primers used for constructing site-direct mutants of <i>glmU</i><br>gene .....                                   | 6 |
| Figure S5. Sequences alignment of <i>glmU</i> gene and the cloned pMD18- <i>glmU</i> mutants<br>(Gly433Ala, Ala434Ser, Ala451Ser). .... | 7 |
| Figure S6. SDS-PAGE (a) and Western blot (b) detection of purified GlmU mutants.                                                        | 7 |

Table S1. Herbal medicines and their inhibitory effects against GlmU AT.

| No. | Name                                  | Activity remaining (%) | SD    |
|-----|---------------------------------------|------------------------|-------|
| 1   | Cirsii Herba                          | 65.49                  | 10.07 |
| 2   | Typhae Pollen                         | 76.15                  | 3.70  |
| 3   | Carthami Flos                         | 76.30                  | 12.87 |
| 4   | Cynanchi Atrati Radix Rhizoma         | 65.99                  | 5.51  |
| 5   | Tuckahoe with pine                    | 77.00                  | 2.80  |
| 7   | Corydalis Rhizoma                     | 77.21                  | 6.18  |
| 8   | Cassiae Semen                         | 76.19                  | 11.94 |
| 9   | Pseudostellariae Radix                | 89.24                  | 9.98  |
| 10  | Lonicerae Japonicae Flos              | 89.02                  | 7.33  |
| 11  | Mori Folium                           | 99.26                  | 0.28  |
| 12  | Chuanxiong Rhizoma                    | 100.62                 | 1.72  |
| 13  | Euphorbiae Ebracteolatae Radix        | 33.34                  | 1.24  |
| 14  | Forsythiae Fructus                    | 52.27                  | 6.12  |
| 15  | Aurantii Fructus Immaturus            | 55.35                  | 8.08  |
| 16  | Ginseng Radix et Rhizoma Rubra        | 50.55                  | 0.63  |
| 17  | Cuscurae Semen                        | 55.51                  | 11.10 |
| 18  | Sophorae Tonkinensis Radix et Rhizoma | 41.33                  | 3.61  |
| 18  | Gastrodiae Rhizoma                    | 85.12                  | 7.24  |
| 19  | Epimedii Folium                       | 61.63                  | 5.06  |
| 20  | Magnoliae Officinalis Cortex          | 51.06                  | 6.03  |
| 21  | Polygonati Rhizoma                    | 90.43                  | 11.94 |
| 22  | Curcumae Radix                        | 75.97                  | 9.15  |
| 23  | Rhei Radix et Rhizoma                 | 61.45                  | 9.71  |
| 24  | Cimicifugae Rhizoma                   | 61.78                  | 2.68  |
| 25  | Ziziphi Spinosae Semen                | 52.17                  | 6.31  |
| 26  | Poria                                 | 59.24                  | 11.37 |
| 27  | Sinomenii Caulis                      | 70.31                  | 8.83  |
| 28  | Gentianae Radix et Rhizoma            | 64.27                  | 4.85  |
| 29  | Mori Ramulus                          | 57.47                  | 0.93  |
| 30  | Erigerontis Herba                     | 50.93                  | 1.92  |
| 31  | Foeniculi Fructus                     | 64.65                  | 1.48  |
| 32  | Ganoderma                             | 42.61                  | 0.31  |
| 33  | Cistanches Herba                      | 47.27                  | 5.00  |
| 34  | Houttuynia cordata Thunb              | 46.36                  | 1.88  |
| 35  | Polygoni Multiflori Radix             | 85.01                  | 9.76  |
| 36  | Tribulifructus                        | 87.82                  | 3.95  |
| 37  | Herba Hedyotidis                      | 102.68                 | 1.19  |
| 38  | Glehniae Radix                        | 99.43                  | 4.76  |
| 39  | Astragali Radix                       | 103.78                 | 0.24  |
| 40  | Xanthii Fructus                       | 98.44                  | 5.24  |
| 41  | Atractylodis Macrocephalae Rhizoma    | 105.88                 | 0.50  |

|    |                               |        |       |
|----|-------------------------------|--------|-------|
| 42 | Acori TatarinowiiRhizoma      | 70.54  | 2.70  |
| 43 | Dipsaci Radix                 | 78.51  | 6.59  |
| 44 | Bupleuri Radix                | 89.69  | 12.94 |
| 45 | Pogostemonis Herba            | 75.80  | 0.71  |
| 46 | Schisandrae Chinensis Fructus | 56.64  | 0.40  |
| 47 | Ligustri Lucidi Fructus       | 77.709 | 4.13  |
| 48 | Hordei Fructus Germinatus     | 88.67  | 18.72 |
| 49 | Sennae Folium                 | 101.92 | 5.68  |

Table S2. The inhibitory effect of Ebractenoid F on GlmU acetyltransferase

| IC <sub>50</sub> (μM) | K <sub>i</sub> (μM)       |                         |
|-----------------------|---------------------------|-------------------------|
|                       | <i>Ki-com</i> /Acetyl CoA | <i>Ki-com</i> /GlcN-1-P |
| 13.98                 | 18.59                     | 26.77                   |

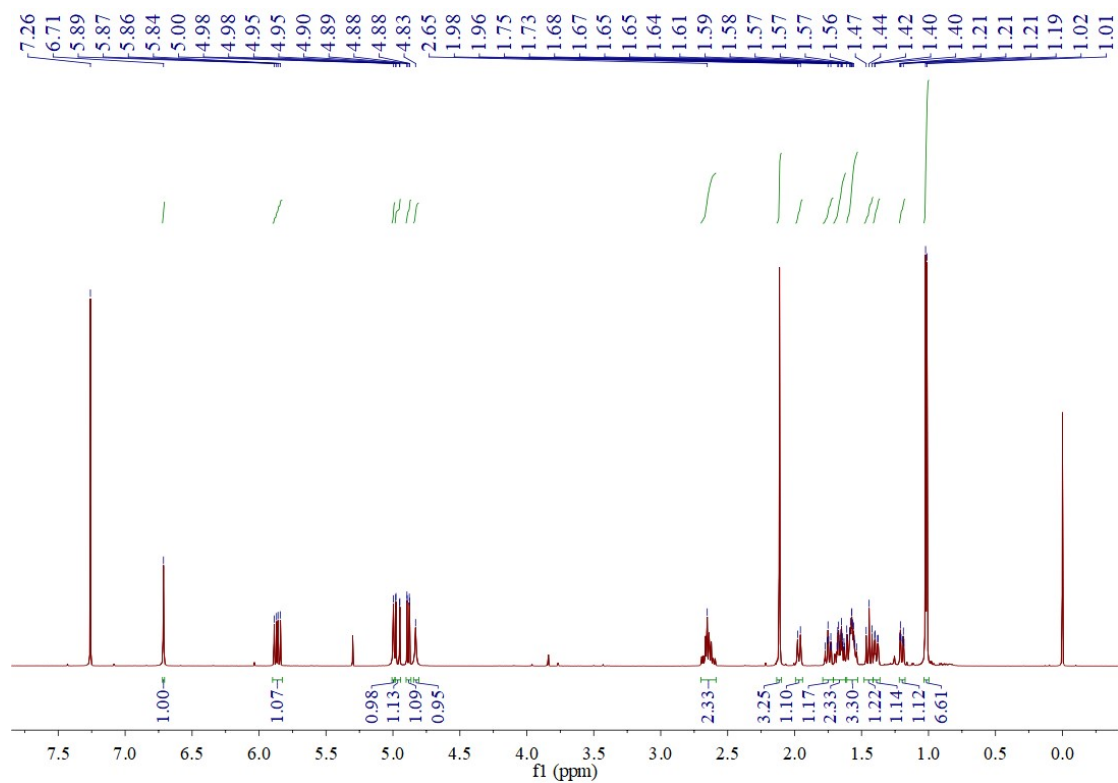

Figure S1.  $^1\text{H}$  NMR spectrum ( $\text{CDCl}_3$ , 600 MHz) of Ebractenoid F.

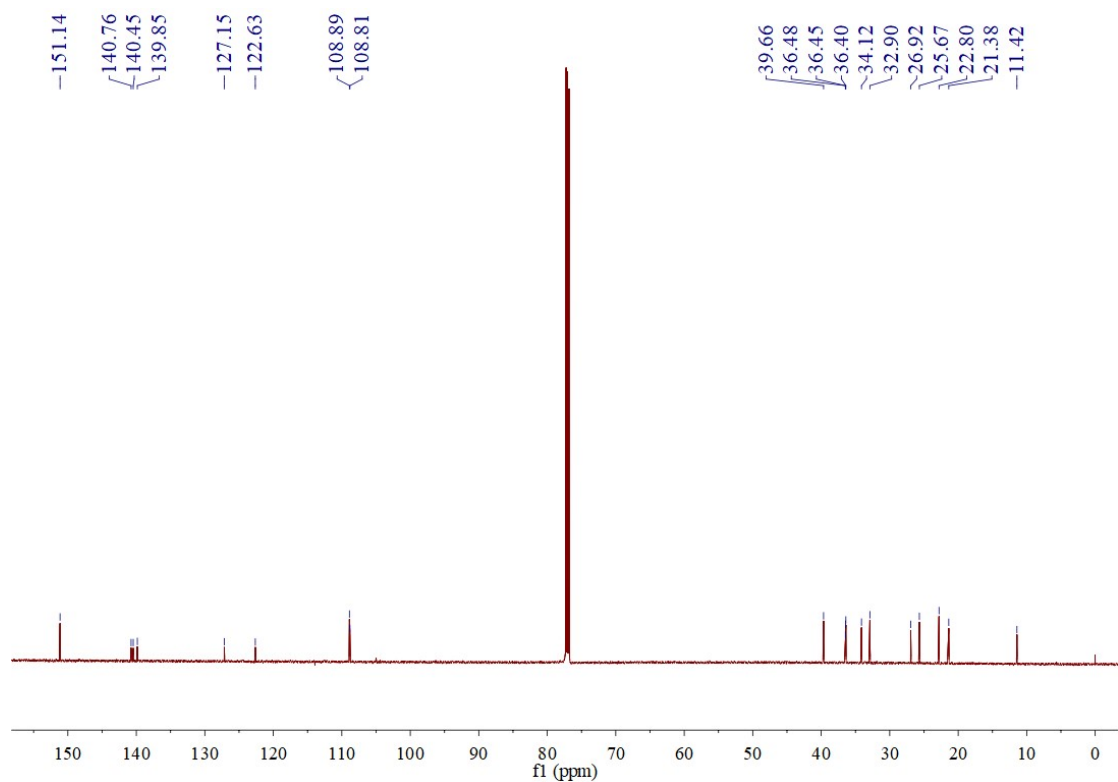

Figure S2.  $^{13}\text{C}$  NMR spectrum ( $\text{CDCl}_3$ , 150 MHz) of Ebractenoid F.

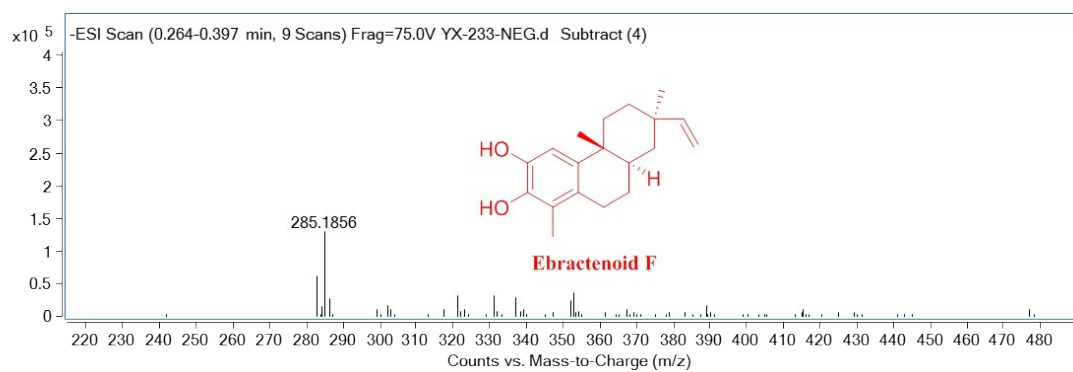

Figure S3. HR-MS of Ebractenoid F.

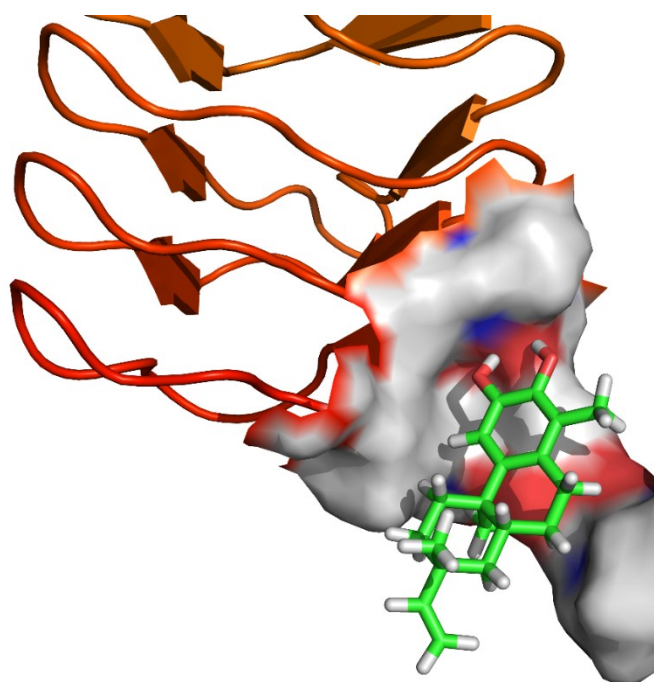

Figure S4. Docking analysis of ebractenoid F and GlmU (PDB code: 4K6R).

Table S3. Sequences of primers used for constructing site-direct mutants of *glmU* gene

| Mutations | Forward primer (5'-3')     | Reverse primer (5'-3')     |
|-----------|----------------------------|----------------------------|
| Gly433Ala | CGCGTATACCGCGGCCGCACAGTGG  | CCGTCGCCGATGGTTACTGGGGCCAC |
| Ala434Ser | CGCGTATACCGGGTCCGGCACAGTGG | CCGTCGCCGATGGTTACTGGGGCCAC |
| Ala451Ser | GGCAGTGTCTCGGGTCCGCAACGCAA | AGCGCCCCCGCGGGACATC        |
